# Supplementary material
Source: Research Square preprint supplement (doi:10.21203/rs.3.rs-9450678/v1)
Supplement: Supplementary file 1 [file 505b54b999f1ca7c17eb66e2.docx]

Table S2 Pairwise identities between L1 nucleotide sequences of all known avian papillomavirus genotypes

| **Accession No.** | **Names** | **Identity** |
| --- | --- | --- |
| PX705373 | Anas platyrhynchos papillomavirus 3 | 61.80% |
| PP057987 | Anas platyrhynchos papillomavirus 3 | 61.70% |
| NP 647590.1 | Psittacus erithacus papillomavirus 1 | 60.10% |
| AF502599 | Psittacus erithacus timneh papillomavirus | 60.10% |
| OP628184 | Columba livia papillomavirus 1 | 61.00% |
| MK620319 | Duck papillomavirus 3 | 62.80% |
| MK620303 | Duck papillomavirus 3 | 62.30% |
| NC 013117 | Francolinus leucoscepus papillomavirus 1 | 55.70% |
| PP922140 | Todiramphus sanctus papillomavirus 1 | 60.70% |
| NC 040548 | Serinus canaria papillomavirus 1 | 58.00% |
| PQ583407 | Pygoscelis adeliae papillomavirus 2 | 57.50% |
| MF168943 | Pygoscelis adeliae papillomavirus 2 | 58.10% |
| BK066727 | Papillomavirus luscinia7441 | 57.50% |
| MK620330 | Gull papillomavirus 1 | 58.80% |
| MK620329 | Gull papillomavirus 2 | 58.30% |
| MK620327 | Gull papillomavirus 1 | 59.20% |
| MK620304 | Gull papillomavirus 1 | 59.10% |
| NC 003973 | Psittacus erithacus timneh papillomavirus | 60.10% |
| NC 004068 | Fringilla coelebs Papillomavirus 1 | 57.30% |
| KU504337 | Etapapillomavirus 1 | 57.30% |
| EU188799 | Francolinus leucoscepus papillomavirus 1 | 55.70% |
| AY057109 | Fringilla coelebs papillomavirus | 57.30% |
| KJ173785 | Pygoscelis adeliae papillomavirus | 55.30% |
| NC 024300 | Fulmarus glacialis papillomavirus 1 | 50.10% |
| NC 023894 | Pygoscelis adeliae papillomavirus | 55.30% |
| KX147683 | Duck papillomavirus | 52.40% |
| MF564196 | Serinus canaria papillomavirus 1 | 58.00% |
| MK620302 | Puffin papillomavirus 1 | 56.60% |
| MK620331 | Gull papillomavirus 3 | 57.10% |
| MK620332 | Kittiwake papillomavirus 1 | 57.10% |
| MK620305 | Kittiwake papillomavirus 2 | 56.60% |
| MK620334 | Kittiwake papillomavirus 3 | 57.90% |
| MK620340 | Kittiwake papillomavirus 6 | 57.00% |
| PQ583408 | Pygoscelis adeliae papillomavirus 4 | 61.10% |
