# Supplementary material
Source: Research Square preprint supplement (doi:10.21203/rs.3.rs-9450678/v1)
Supplement: Supplementary file 2 [file 890929b5d22f8c9cc7f69105.docx]

Table S1 Primers used for ampliﬁcation of GuPV sequences

| Name | Sequence | Position |
| --- | --- | --- |
| 1-1F | CAGAGGAGGAGGAGGAGGAGGAG | 1353–1375 |
| 1-1R | GGCAGCGTTGAAGTAGCTCTTC | 2033–2054 |
| 2-1F | GAAGAGCTACTTCAACGCTGCC | 2033–2054 |
| 2-2R | TCATCATAATGGCATCTTTTGC | 3567–3585 |
| 3-3F | GCAAAAGATGCCATTATGATGA | 3567–3585 |
| 3-3R | ACCCGTGCCAATCCCAAGACCAC | 4851–4873 |
| 4-4F | GTGGTCTTGGGATTGGCACGGGT | 4851–4873 |
| 4-4R | CATCTCAGGAAATGGGTCGTCTA | 6229–6251 |
| 5-5F | TAGACGACCCATTTCCTGAGATG | 6229–6251 |
| 5-5R | AAATCCATAGCACCAAAACCAAT | 6883–6905 |
| 6-6F | ATTGGTTTTGGTGCTATGGATTT | 6883–6905 |
| 6-6R | TCCTCCACATGCCGCACAAACTC | 7363–7385 |
| 7-7F | GAGTTTGTGCGGCATGTGGAGGA | 7363–7385 |
| 7-7R | CTCCTCCTCCTCCTCCTCCTCTG | 1353–1375 |
